# Supplementary material for: Pyrexia of Unknown Origin (PUO) in South Asia: A Systematic Review of Diagnostic Gaps and Management Strategies
Source: Research Square preprint supplement (doi:10.21203/rs.3.rs-8713979/v1), 2026-03-18
Supplement: Supplementary file 1 [file 83bcd66fb7ebb607d3d5120f.docx]

**Table 1: Search Strategy for Major Databases**

| **Database** | **Core Search Strategy (Concept Summary)** | **Limits Applied** |
| --- | --- | --- |
| PubMed/  MEDLINE | ("Pyrexia of Unknown Origin"[tiab] OR "Fever of Unknown Origin"[tiab] OR PUO[tiab] OR FUO[tiab] OR "Pyrexia of Unknown Origin"[MeSH]) AND (Nepal OR India OR Pakistan OR Bangladesh OR Sri Lanka OR Bhutan OR Maldives OR Afghanistan) | English; Humans; 2000–2025 |
| Embase | ('pyrexia of unknown origin' OR 'fever of unknown origin' OR PUO OR FUO) AND (Nepal OR India OR Pakistan OR Bangladesh OR Sri Lanka OR Bhutan OR Maldives OR Afghanistan) | English; human studies; 2000–2025 |
| Scopus | ("pyrexia of unknown origin" OR "fever of unknown origin" OR PUO OR FUO) AND (Nepal OR India OR Pakistan OR Bangladesh OR Sri Lanka OR Bhutan OR Maldives OR Afghanistan) | English; 2000–2025 |
| Google Scholars | Keyword-based search combining PUO-related terms with individual South Asian country names | NA |
| IMSEAR | |  | | --- |  | (fever OR pyrexia OR febrile) AND (unknown origin OR unknown cause OR unexplained) AND (Nepal OR India OR Pakistan OR Bangladesh OR Sri Lanka OR Bhutan OR Maldives OR Afghanistan) | | --- | | English; 2000–2025 |
